# Supplementary material
Source: publisher figshare collection journal article supplement (https://plos.figshare.com/articles/dataset/_/1617779)
Supplement: Supplementary file [file 1]

**S1 Table. Modelling strategies for the hazards included in the WHO global burden of foodborne disease estimates.**

| Hazard                                    | Burden attribution approach | Disease model        | Imputation       | Foodborne attribution  |
|-------------------------------------------|-----------------------------|----------------------|------------------|------------------------|
| Diarrheal disease agents                  |                             |                      |                  |                        |
| Norovirus                                 | Categorical attribution     | Attributional        | Pires et al. [1] | Expert elicitation [2] |
| <i>Campylobacter</i> spp.                 | Categorical attribution     | Attributional        | Pires et al. [1] | Expert elicitation [2] |
| Enteropathogenic <i>E. coli</i>           | Categorical attribution     | Attributional        | Pires et al. [1] | Expert elicitation [2] |
| Enterotoxigenic <i>E. coli</i>            | Categorical attribution     | Attributional        | Pires et al. [1] | Expert elicitation [2] |
| Shiga toxin-producing <i>E. coli</i>      | Categorical attribution     | Attributional        | Pires et al. [1] | Expert elicitation [2] |
| Non-typhoidal <i>S. enterica</i>          | Categorical attribution     | Attributional        | Pires et al. [1] | Expert elicitation [2] |
| <i>Shigella</i> spp.                      | Categorical attribution     | Attributional        | Pires et al. [1] | Expert elicitation [2] |
| <i>Vibrio cholerae</i>                    | Categorical attribution     | Attributional        | Pires et al. [1] | Expert elicitation [2] |
| <i>Cryptosporidium</i> spp.               | Categorical attribution     | Attributional        | Pires et al. [1] | Expert elicitation [2] |
| <i>Entamoeba histolytica</i>              | Categorical attribution     | Attributional        | Pires et al. [1] | Expert elicitation [2] |
| <i>Giardia</i> spp.                       | Categorical attribution     | Attributional        | Pires et al. [1] | Expert elicitation [2] |
| Invasive infectious disease agents        |                             |                      |                  |                        |
| Hepatitis A Virus                         | Categorical attribution     | Direct: GBD 2010 [3] | N/A <sup>a</sup> | Expert elicitation [2] |
| <i>Brucella</i> spp.                      | Categorical attribution     | Transitional         | Random effects   | Expert elicitation [2] |
| <i>Listeria monocytogenes</i> , perinatal | Categorical attribution     | Transitional         | Random effects   | 100%                   |
| <i>Listeria monocytogenes</i> , acquired  | Categorical attribution     | Transitional         | Random effects   | 100%                   |
| <i>Mycobacterium bovis</i>                | Categorical attribution     | Attributional        | N/A <sup>a</sup> | 100%                   |
| <i>Salmonella</i> Paratyphi               | Categorical attribution     | Direct: GBD 2010 [3] | N/A <sup>a</sup> | Expert elicitation [2] |
| <i>Salmonella</i> Typhi                   | Categorical attribution     | Direct: GBD 2010 [3] | N/A <sup>a</sup> | Expert elicitation [2] |

| Hazard                                                       | Burden attribution approach | Disease model        | Imputation       | Foodborne attribution  |
|--------------------------------------------------------------|-----------------------------|----------------------|------------------|------------------------|
| <i>Toxoplasma gondii</i> , congenital                        | Categorical attribution     | Transitional         | Random effects   | Expert elicitation [2] |
| <i>Toxoplasma gondii</i> , acquired                          | Categorical attribution     | Transitional         | Random effects   | Expert elicitation [2] |
| Enteric intoxications                                        |                             |                      |                  |                        |
| <i>Bacillus cereus</i> <sup>b</sup>                          | Categorical attribution     | Direct               | Uniform          | 100%                   |
| <i>Clostridium botulinum</i> <sup>b</sup>                    | Categorical attribution     | Direct               | Uniform          | 100%                   |
| <i>Clostridium perfringens</i> <sup>b</sup>                  | Categorical attribution     | Direct               | Uniform          | 100%                   |
| <i>Staphylococcus aureus</i> <sup>b</sup>                    | Categorical attribution     | Direct               | Uniform          | 100%                   |
| Cestodes                                                     |                             |                      |                  |                        |
| <i>Echinococcus granulosus</i> , cases seeking treatment     | Categorical attribution     | Transitional         | Random effects   | Expert elicitation [2] |
| <i>Echinococcus granulosus</i> , cases not seeking treatment | Categorical attribution     | Transitional         | Random effects   | Expert elicitation [2] |
| <i>Echinococcus multilocularis</i>                           | Categorical attribution     | Transitional         | Random effects   | Expert elicitation [2] |
| <i>Taenia solium</i>                                         | Categorical attribution     | Attributional        | N/A <sup>a</sup> | 100%                   |
| Nematodes                                                    |                             |                      |                  |                        |
| <i>Ascaris</i> spp.                                          | Categorical attribution     | Direct: GBD 2010 [3] | Random effects   | Expert elicitation [2] |
| <i>Trichinella</i> spp.                                      | Categorical attribution     | Direct               | N/A <sup>a</sup> | 100%                   |
| Trematodes                                                   |                             |                      |                  |                        |
| <i>Clonorchis sinensis</i>                                   | Categorical attribution     | Direct               | Random effects   | 100%                   |
| <i>Fasciola</i> spp.                                         | Categorical attribution     | Direct               | Random effects   | 100%                   |
| Intestinal flukes <sup>c</sup>                               | Categorical attribution     | Direct               | Random effects   | 100%                   |
| <i>Opisthorchis</i> spp.                                     | Categorical attribution     | Direct               | Random effects   | 100%                   |
| <i>Paragonimus</i> spp.                                      | Categorical attribution     | Direct               | Random effects   | 100%                   |

| Hazard                        | Burden attribution approach | Disease model | Imputation     | Foodborne attribution |
|-------------------------------|-----------------------------|---------------|----------------|-----------------------|
| Organic pollutants            |                             |               |                |                       |
| Dioxin                        | Risk assessment             | Direct        | Random effects | 100%                  |
| Toxins and allergens          |                             |               |                |                       |
| Aflatoxin                     | Counterfactual analysis     | Attributional | Random effects | 100%                  |
| Cyanide in cassava            | Categorical attribution     | Direct        | Uniform        | 100%                  |
| Peanut allergens <sup>b</sup> | Categorical attribution     | Direct        | Uniform        | 100%                  |

<sup>a</sup> No imputation had to be performed because data were used that had already been imputed.

<sup>b</sup> Excluded from global burden assessments.

<sup>c</sup> Includes *Echinostoma* spp., *Fasciolopsis buski*, *Heterophyes* spp., *Metagonimus* spp. and other foodborne intestinal trematode species.

## References

1. Pires SM, Fischer-Walker CL, Lanata CF, Devleesschauwer B, Hall AJ, et al. (submitted) Aetiology-specific estimates of the global and regional incidence and mortality of diarrhoeal diseases commonly transmitted through food.
2. Hald T, Aspinall W, Devleesschauwer B, Cooke R, Corrigan T, et al. (submitted) Estimates of the relative contributions to the burden of disease due to selected foodborne hazards: a World Health Organization expert elicitation.
3. Murray CJL, Vos T, Lozano R, Naghavi M, Flaxman AD, et al. (2012) Disability-adjusted life years (DALYs) for 291 diseases and injuries in 21 regions, 1990-2010: a systematic analysis for the Global Burden of Disease Study 2010. *Lancet* 380(9859): 2197-2223.
