# Supplementary material
Source: publisher figshare collection journal article supplement (https://plos.figshare.com/articles/dataset/_/1617779)
Supplement: Supplementary file [file 1]

# Norovirus Disease Model

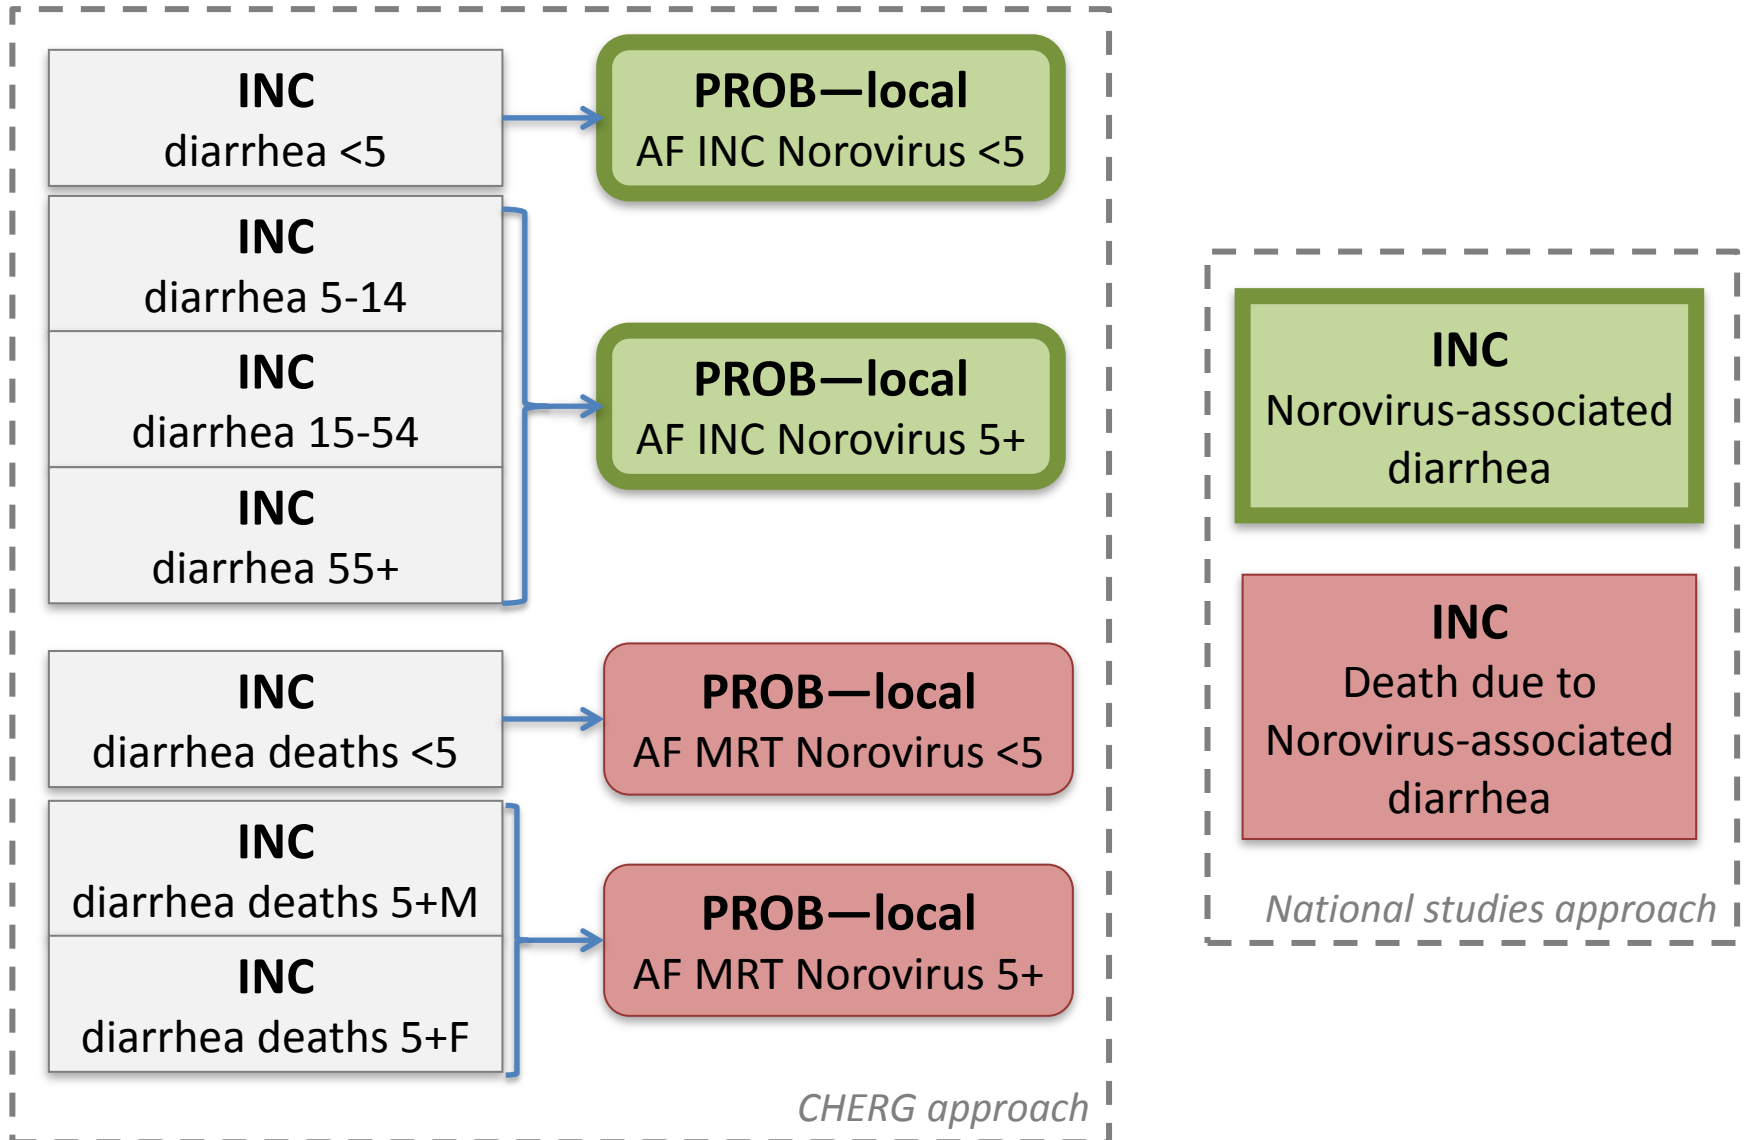

# *Campylobacter* spp. Disease Model

**INC**  
diarrhea <5

**INC**  
diarrhea 5-14

**INC**  
diarrhea 15-54

**INC**  
diarrhea 55+

**INC**  
diarrhea deaths <5

**INC**  
diarrhea deaths 5+M  
**INC**  
diarrhea deaths 5+F

**PROB—local**  
AF INC *Campy* <5

**PROB—local**  
AF INC *Campy* 5+

**PROB—local**  
AF MRT *Campy* <5

**PROB—local**  
AF MRT *Campy* 5+

*CHERG  
approach*

**INC**  
*Campylobacter*-  
associated diarrhea

*National studies  
approach*

**INC**  
Death due to  
*Campylobacter*-  
associated diarrhea

**INC**  
GBS

**PROB—global**  
attributable fraction  
*Campylobacter*

**PROB—global**  
GBS case fatality ratio

# EPEC Disease Model

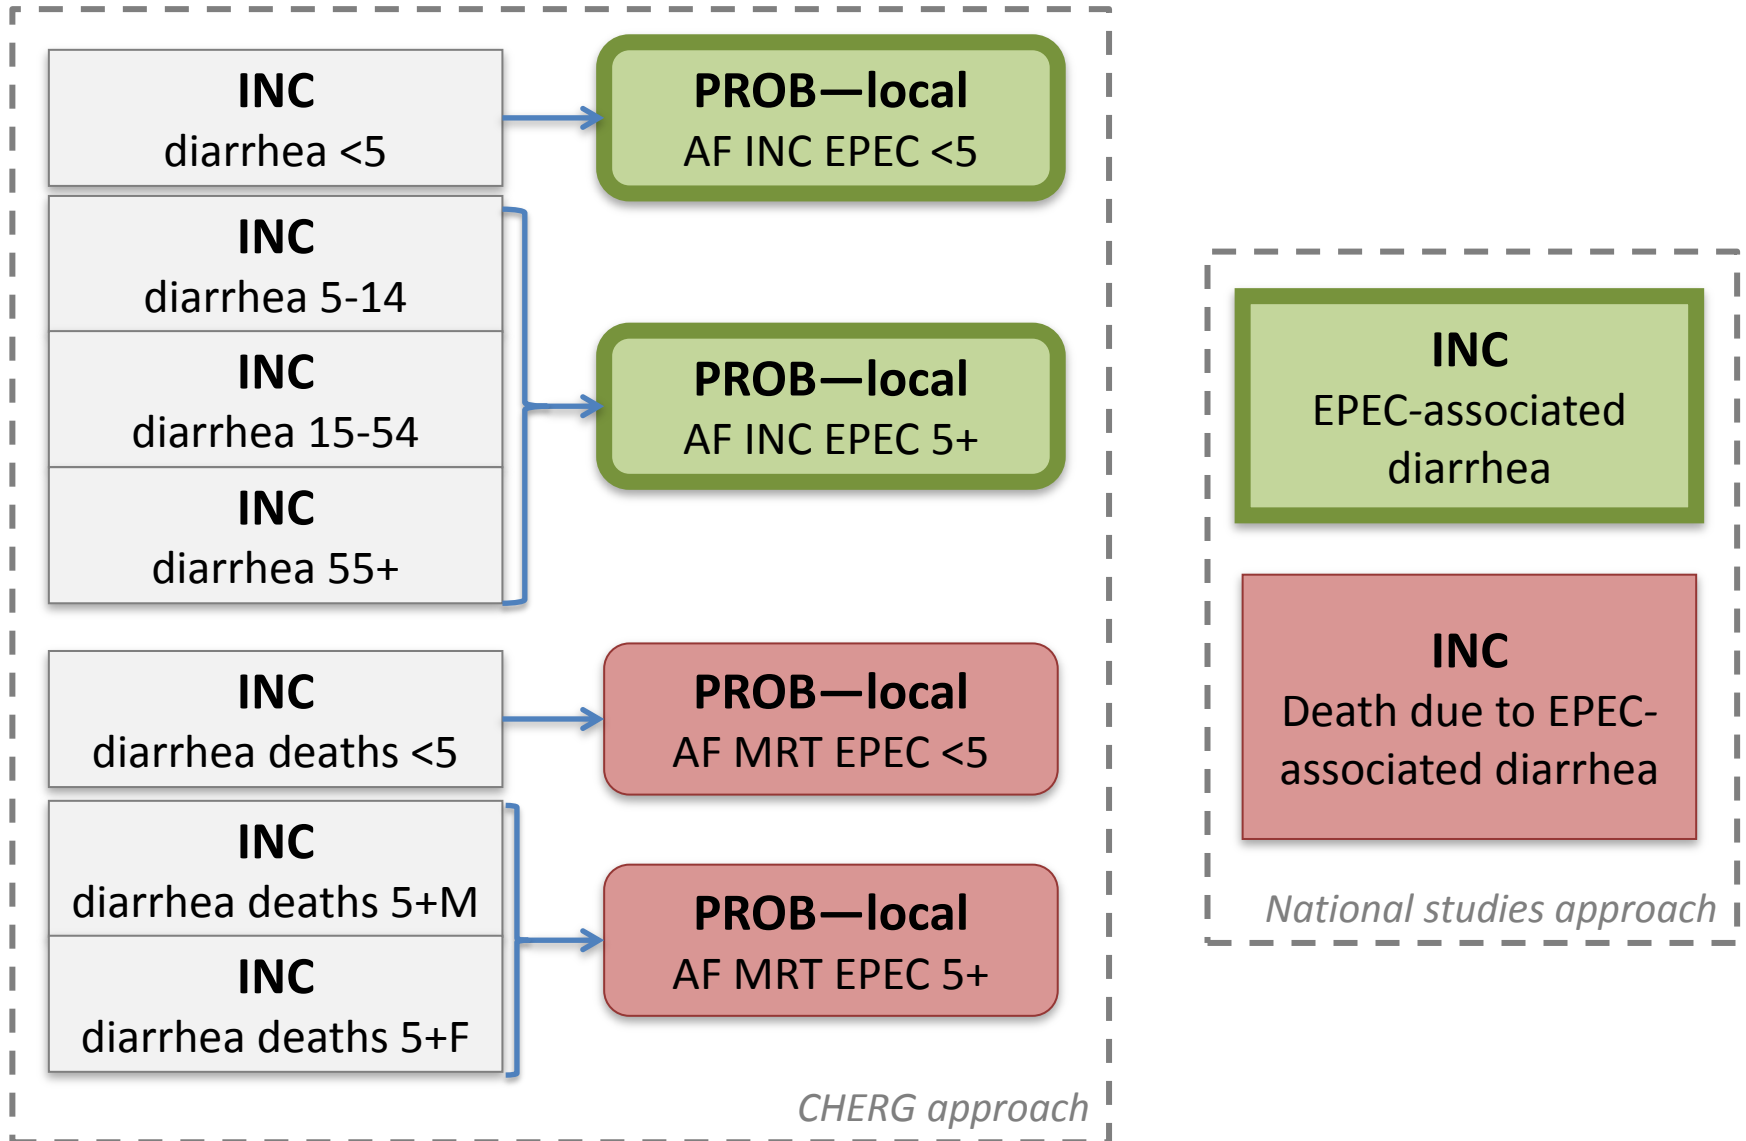

# ETEC Disease Model

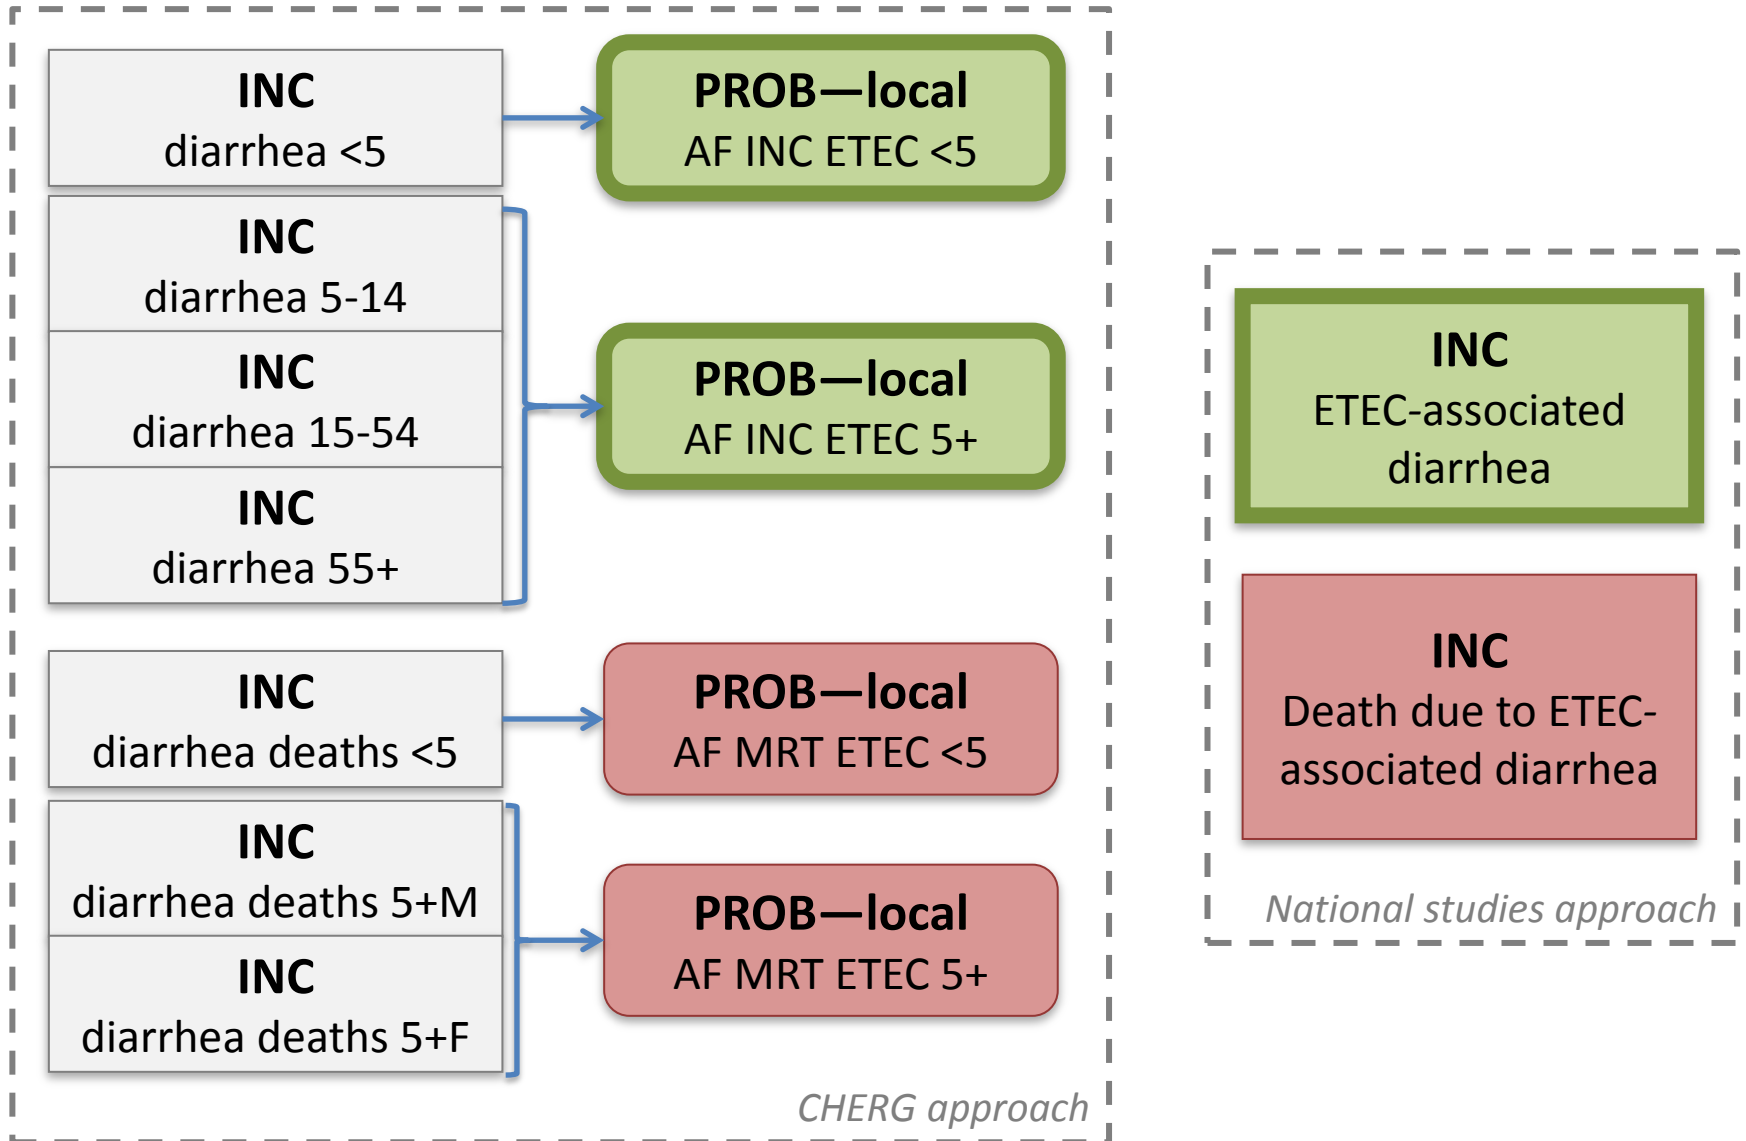

# STEC

## Disease Model

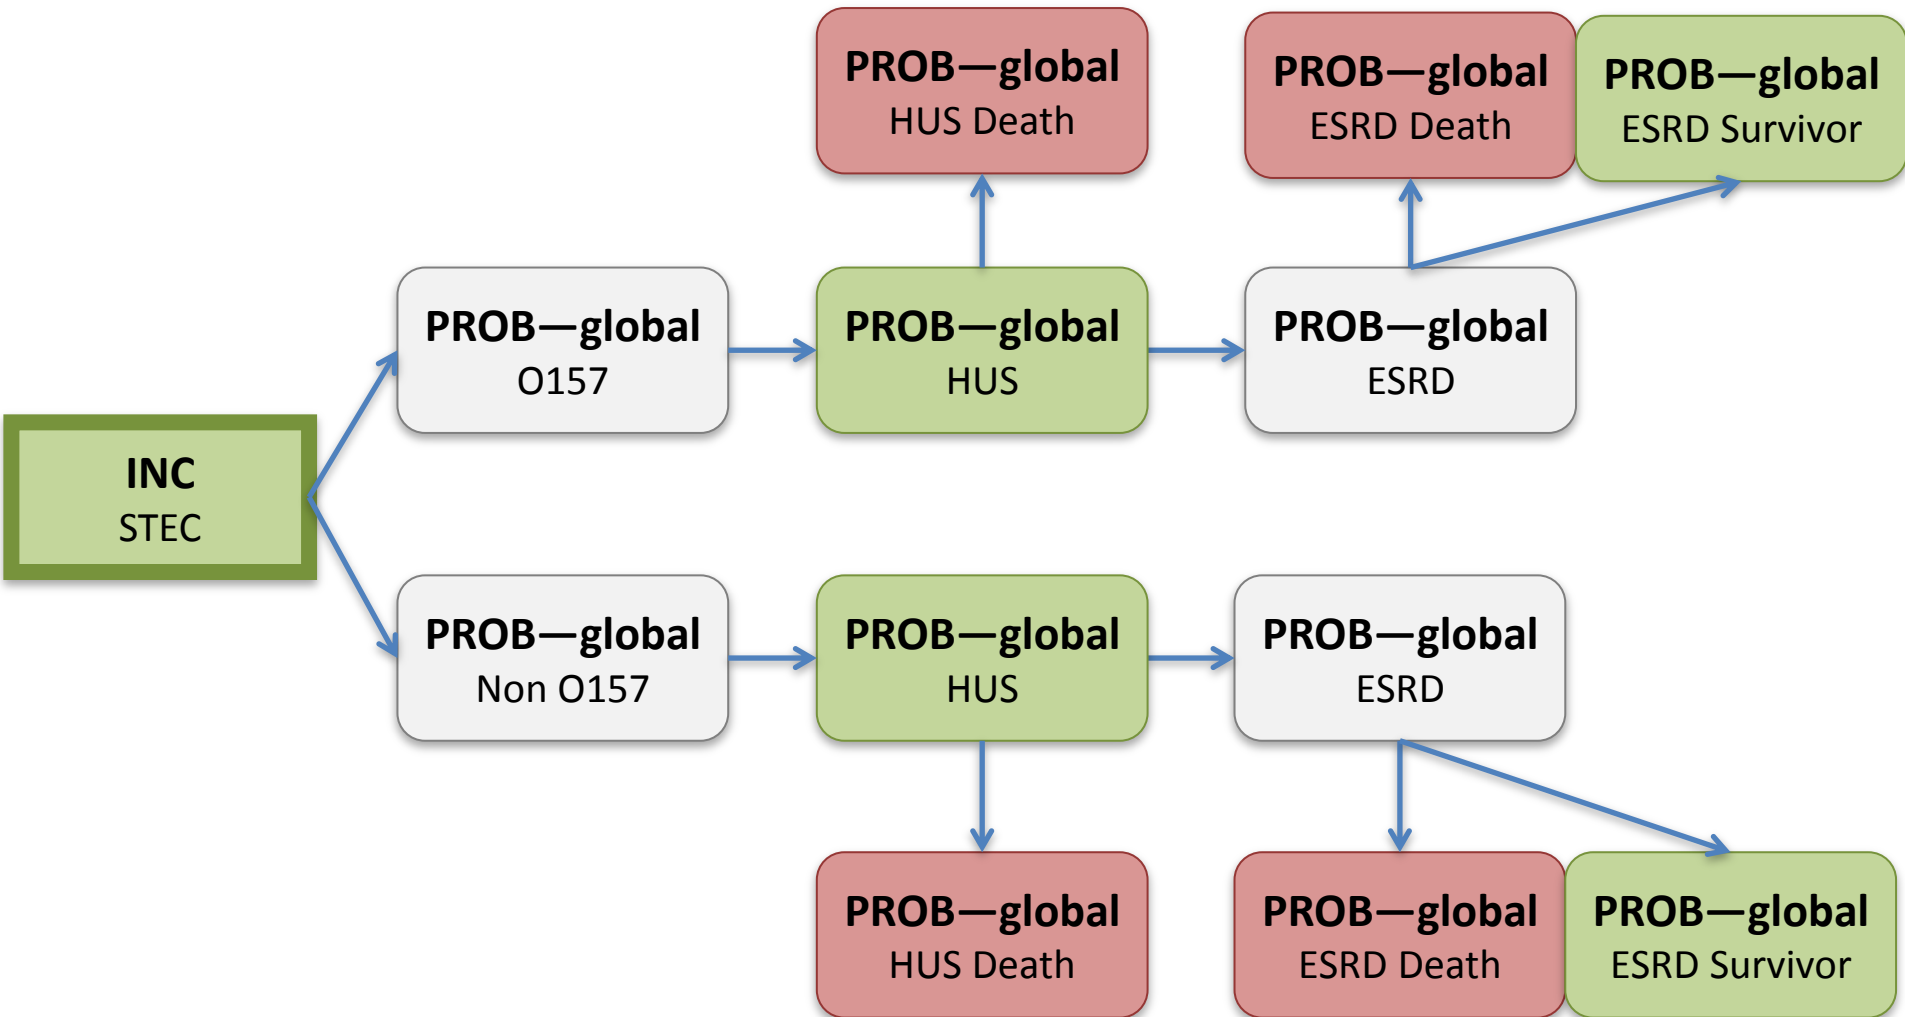

# *Salmonella enterica*

## Disease Model

**INC**  
diarrhea <5

**INC**  
diarrhea 5-14

**INC**  
diarrhea 15-54

**INC**  
diarrhea 55+

**INC**  
diarrhea deaths <5

**INC**  
diarrhea deaths 5+M  
**INC**  
diarrhea deaths 5+F

**PROB—local**  
AF INC *Salmo* <5

**PROB—local**  
AF INC *Salmo* 5+

**PROB—local**  
AF MRT *Salmo* <5

**PROB—local**  
AF MRT *Salmo* 5+

*CHERG  
approach*

**INC**  
*Salmonella*-  
associated diarrhea

*National studies  
approach*

**INC**  
Death due to  
*Salmonella*-  
associated diarrhea

**INC**  
Invasive non-  
typhoidal  
salmonellosis <5

**PROB—global**  
case fatality ratio <5

**INC**  
Invasive non-  
typhoidal  
salmonellosis 5+

**PROB—global**  
case fatality ratio 5+

# *Shigella* spp. Disease Model

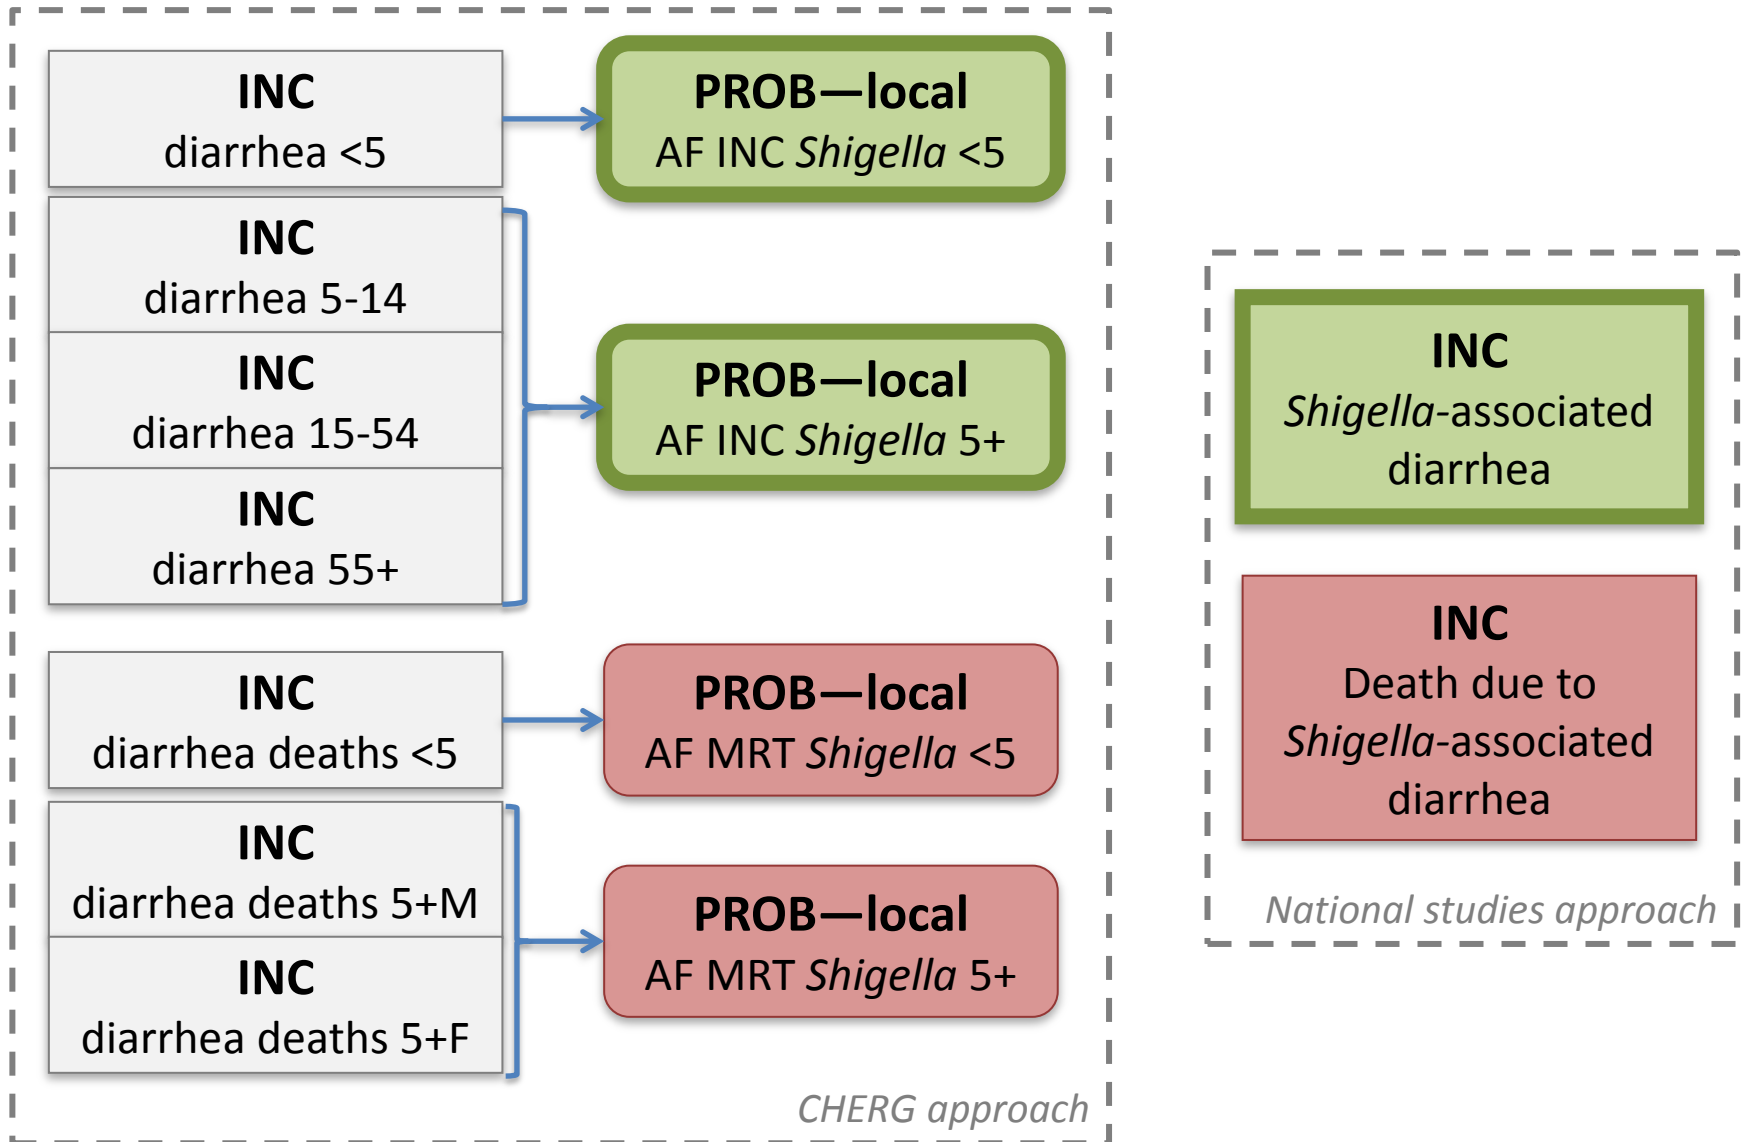

# ***Vibrio cholerae***

## Disease Model

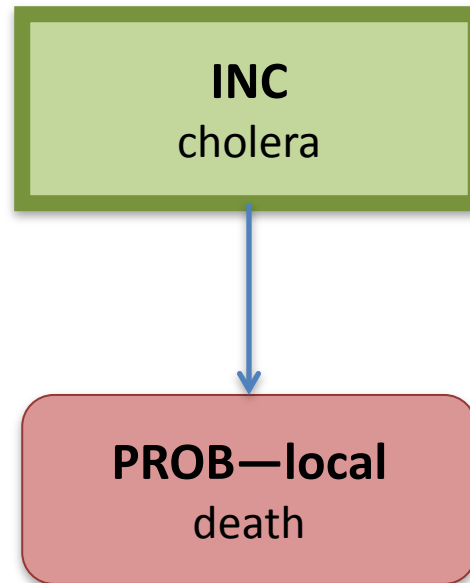



# *Cryptosporidium* spp. Disease Model

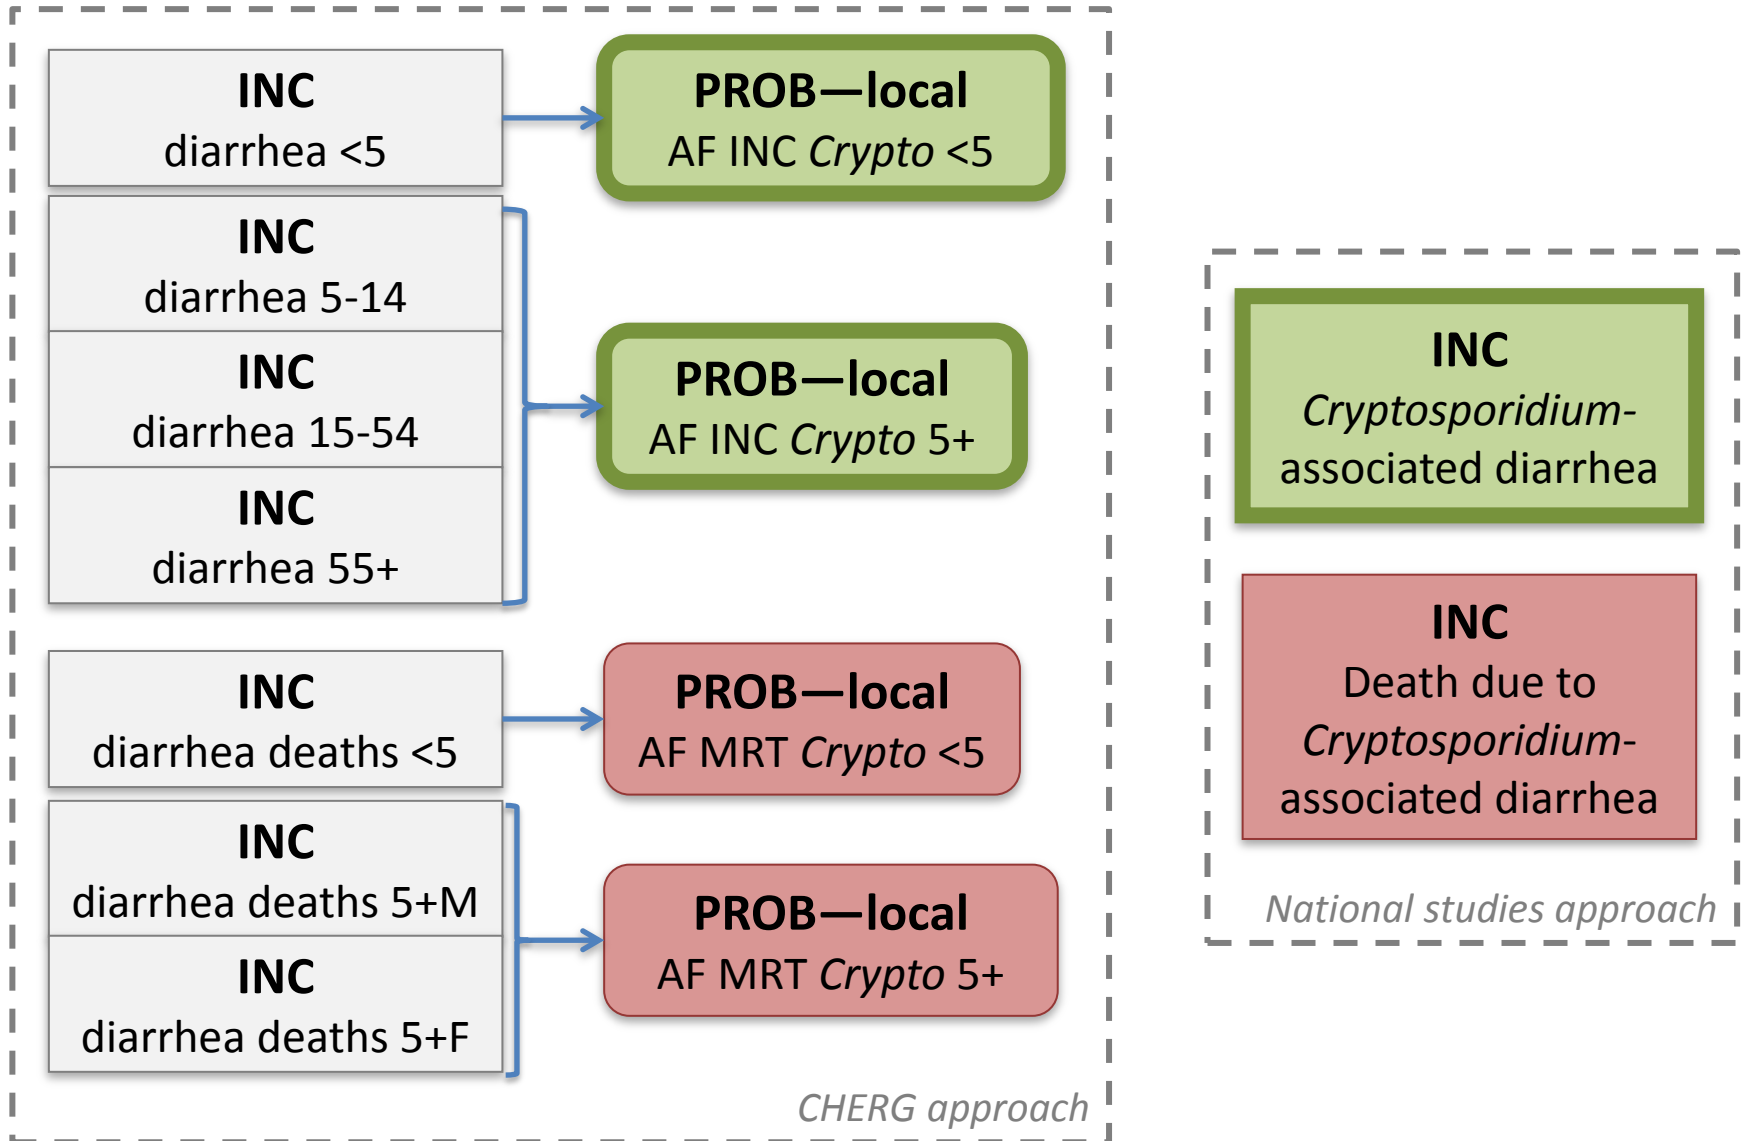

# *Entamoeba histolytica*

## Disease Model

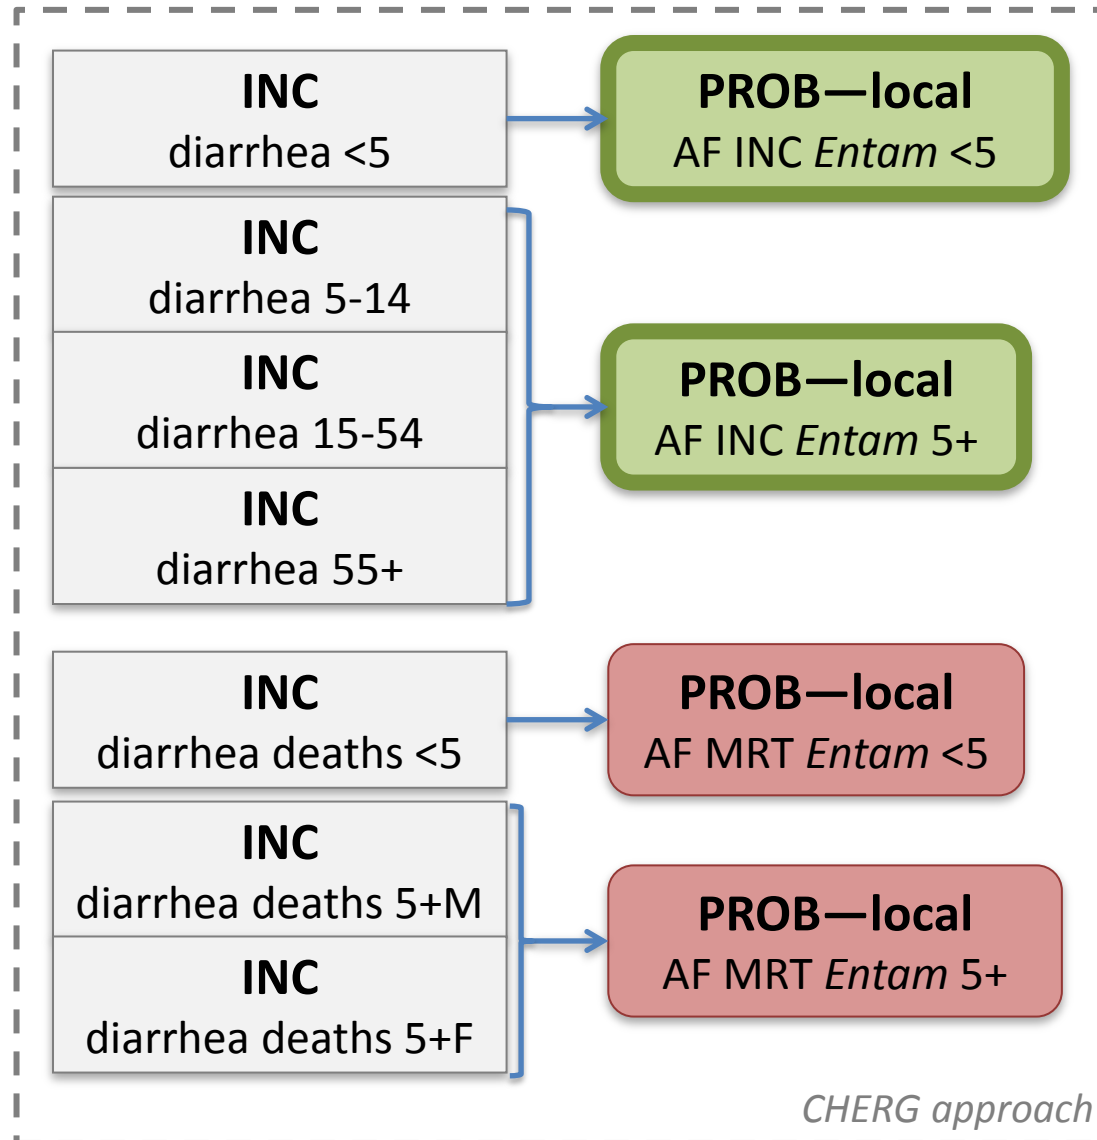

# *Giardia* spp. Disease Model

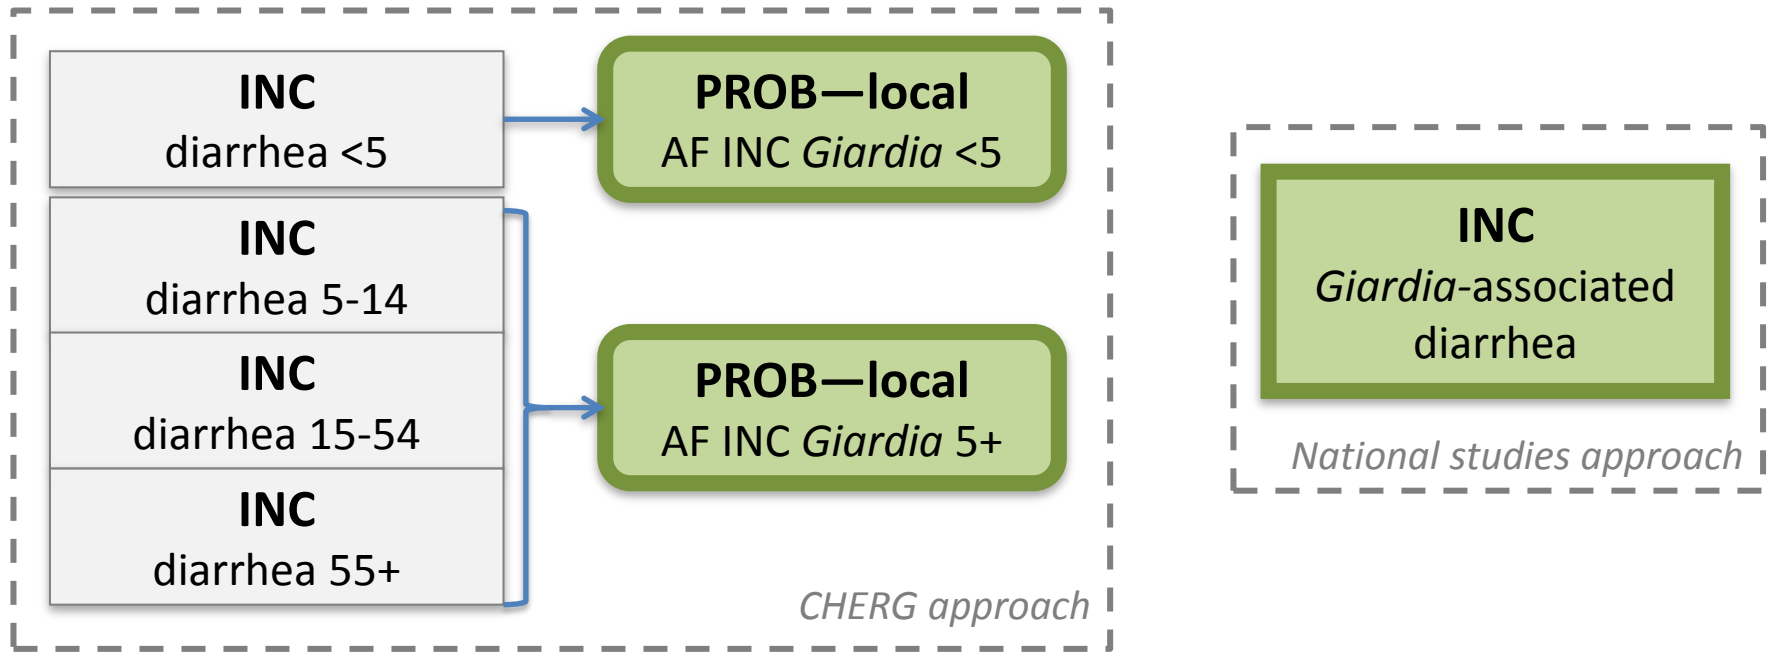

# Hepatitis A virus Disease Model

**INC**  
Hepatitis A

**INC**  
Hepatitis A  
deaths

# ***Brucella* spp.**

## Disease Model

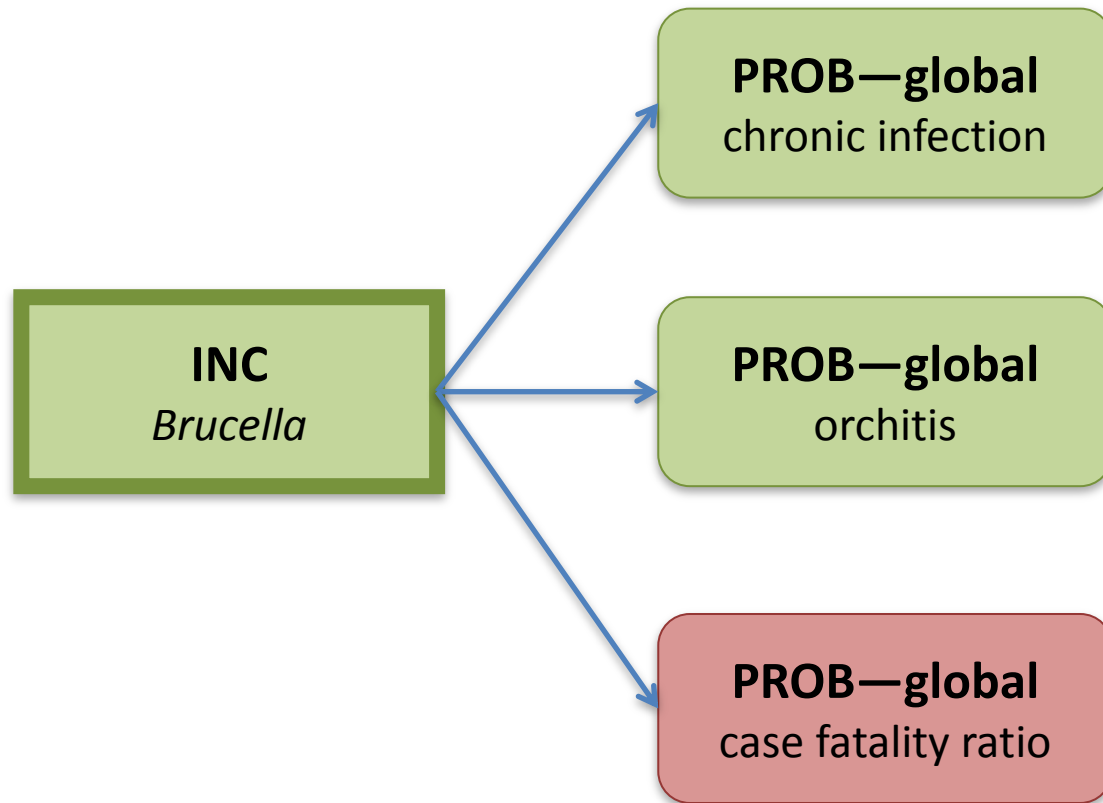

# *Listeria monocytogenes* Disease Model

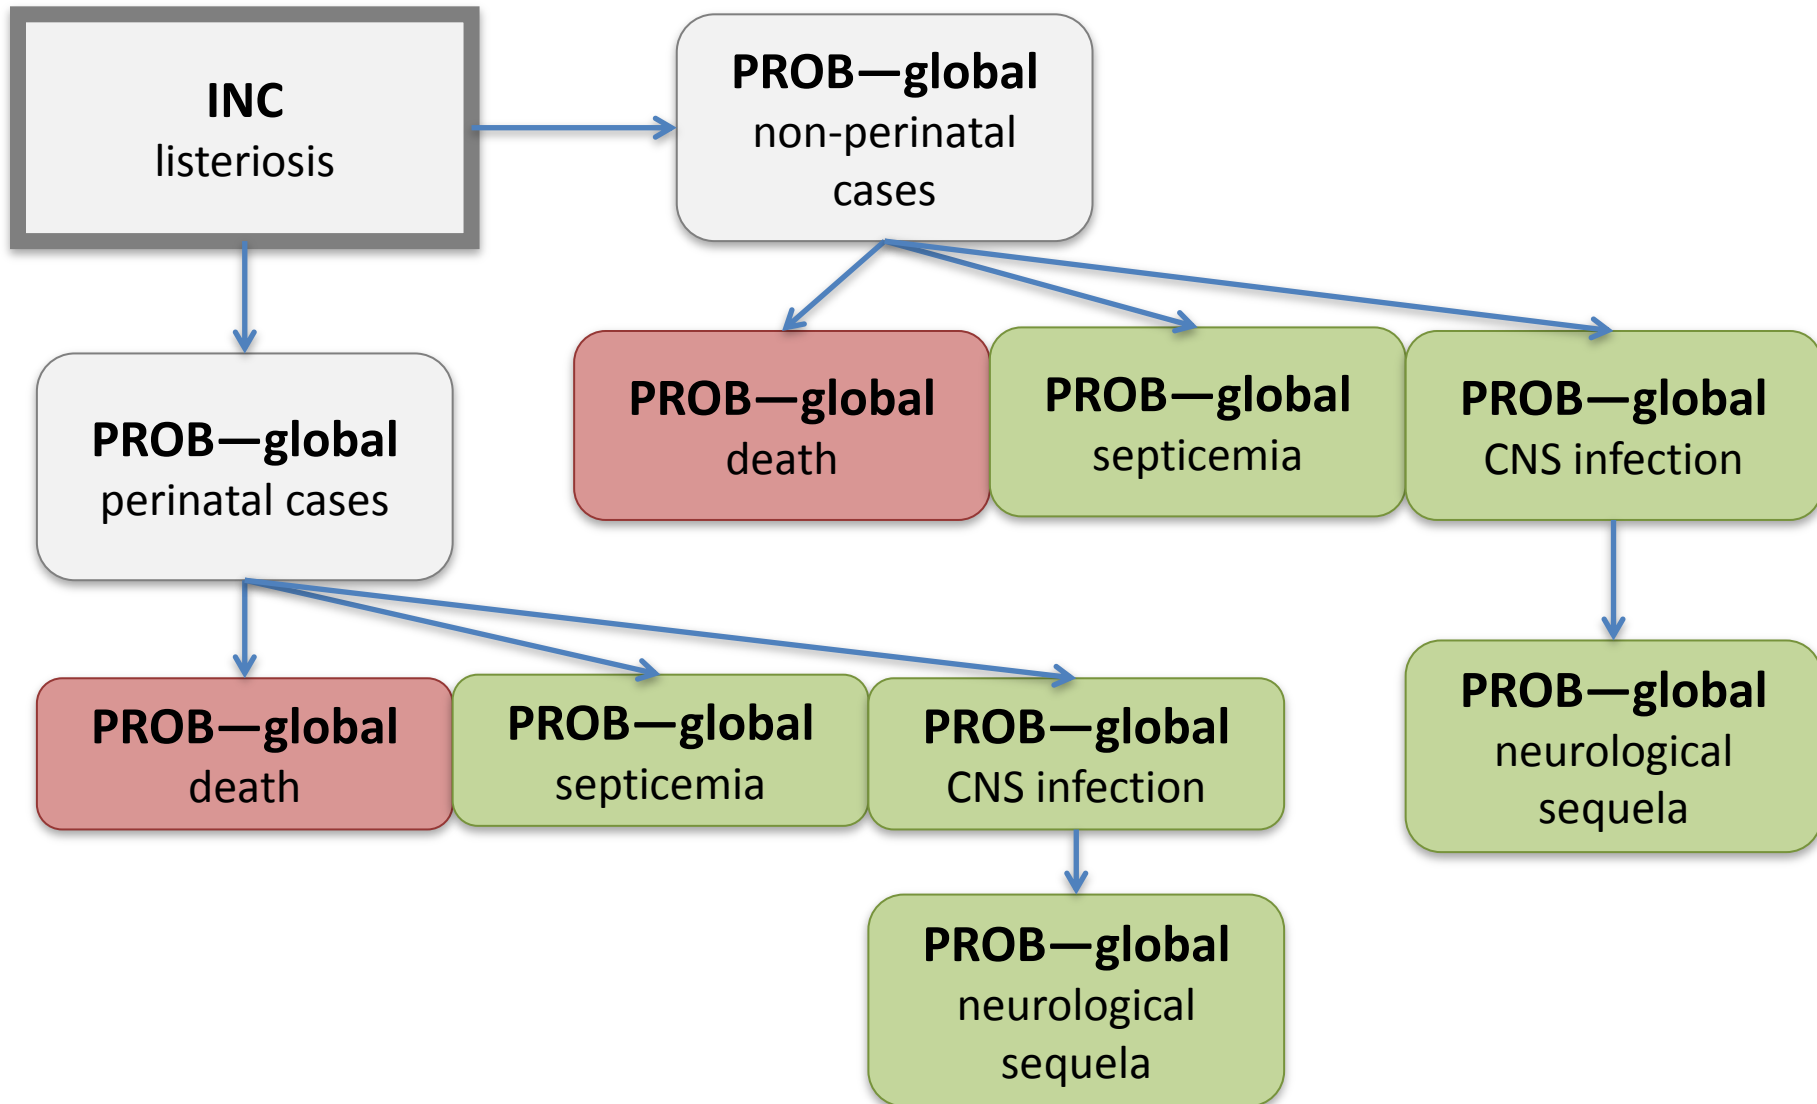

# *Mycobacterium bovis* Disease Model

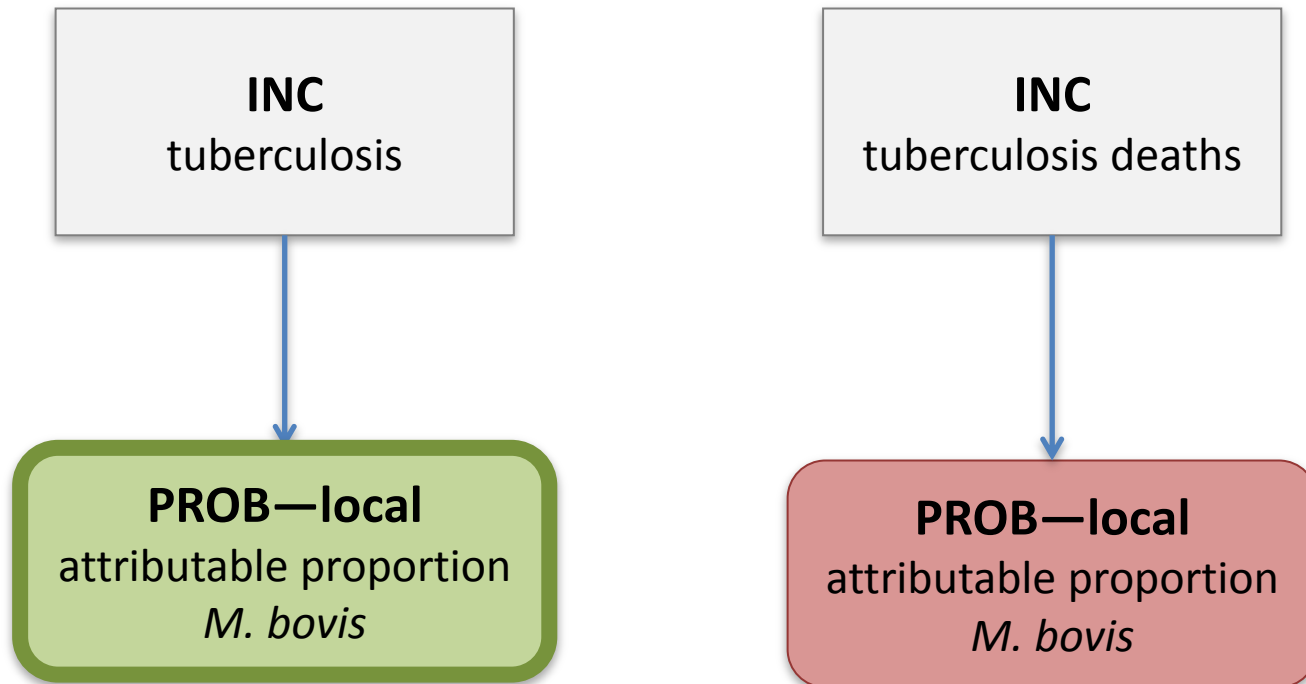

# *Salmonella* Paratyphi Disease Model

**INC**  
Paratyphoid fever

**INC**  
Paratyphoid cysts

**INC**  
Paratyphoid deaths



# *Salmonella* Typhi Disease Model

**INC**  
Typhoid fever

**INC**  
Typhoid cysts

**INC**  
Typhoid deaths

# *Toxoplasma gondii* (congenital) Disease Model

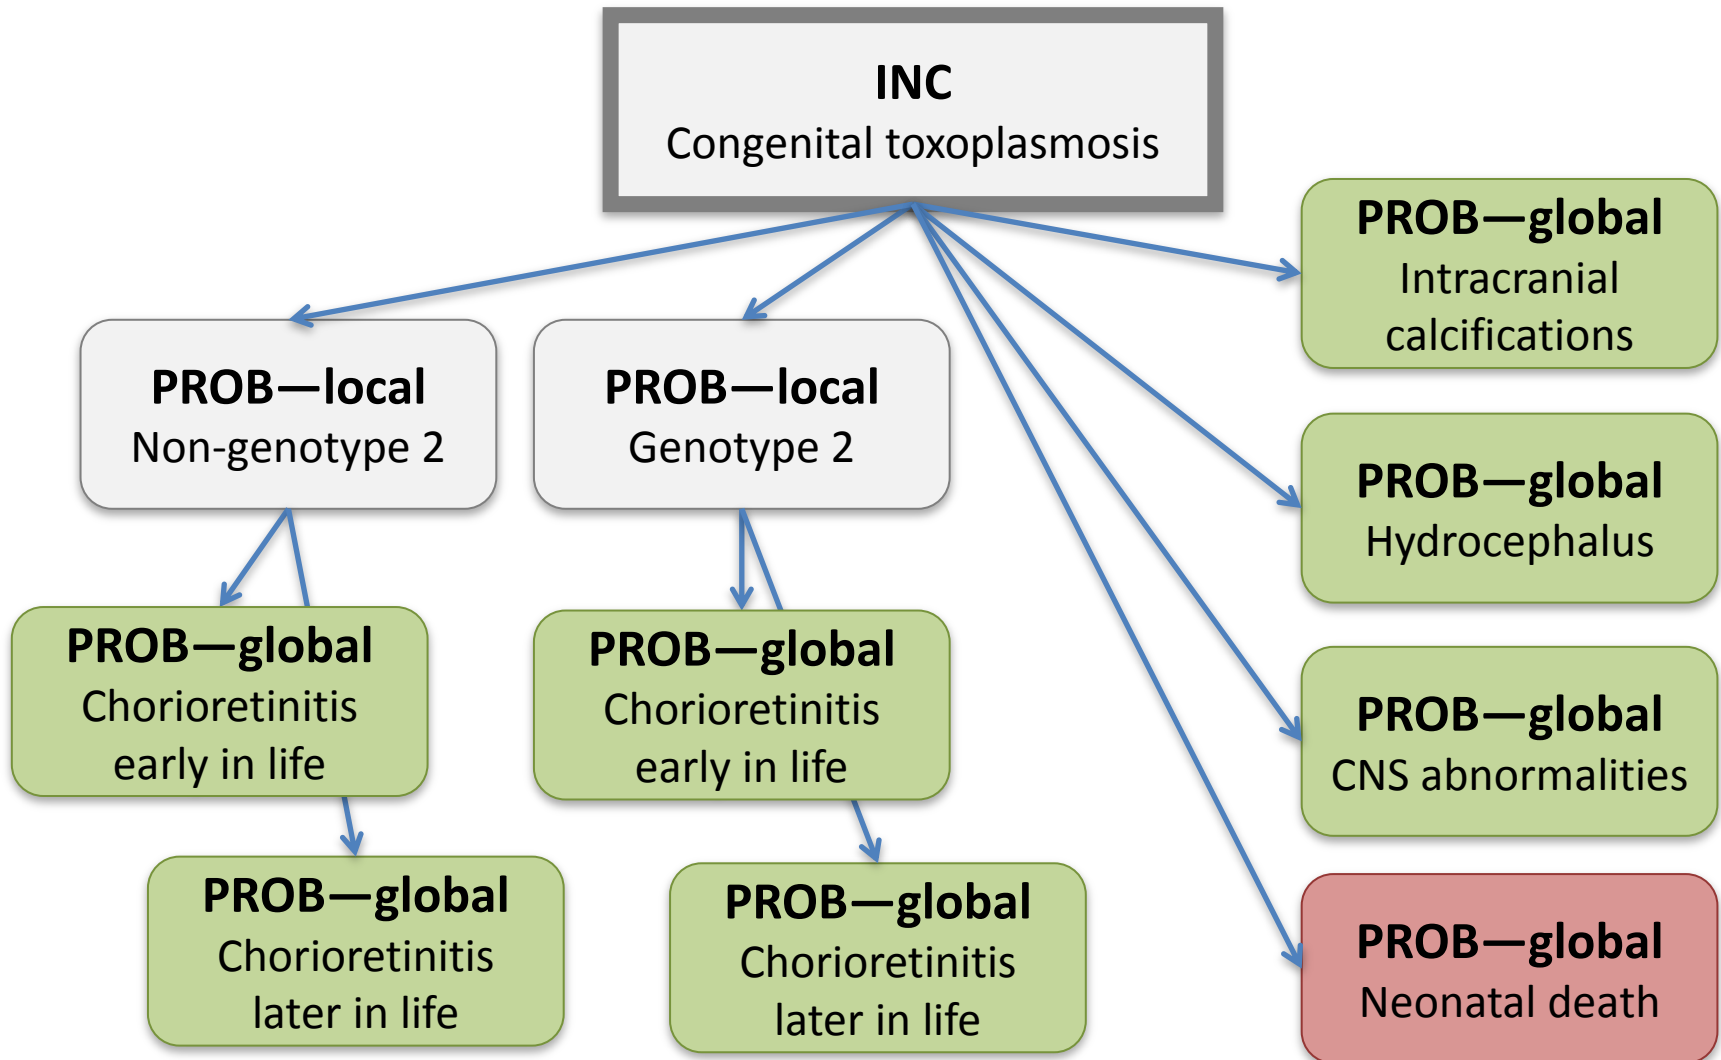

# *Toxoplasma gondii* (acquired) Disease Model

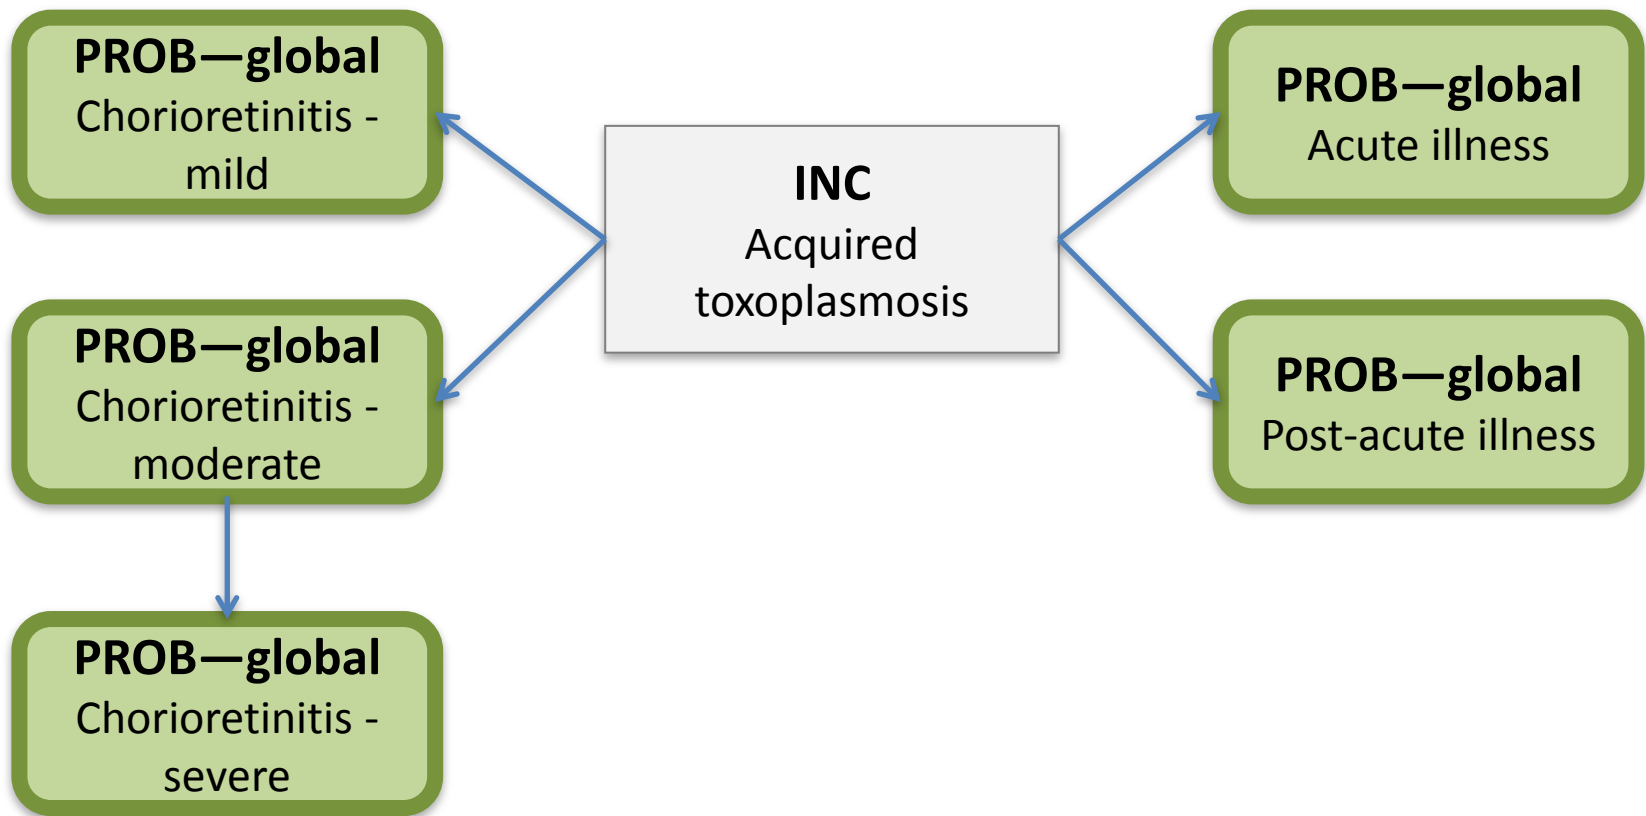

# ***Bacillus cereus***

## Disease Model

**INC**

*B. cereus*

# *Clostridium botulinum*

## Disease Model

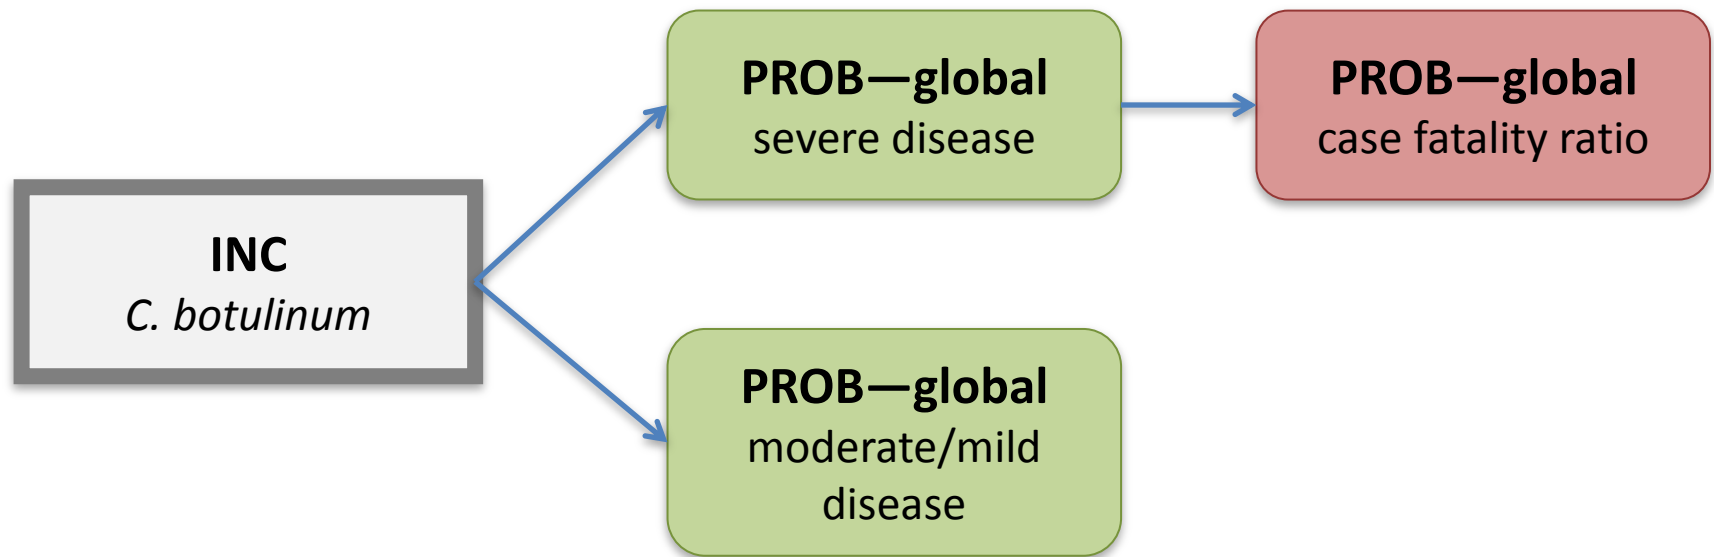

# *Clostridium perfringens*

## Disease Model

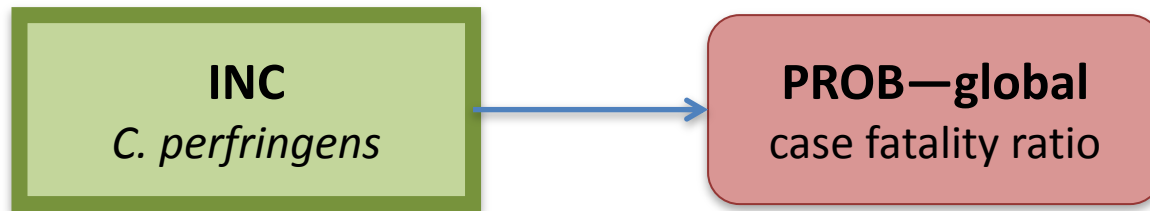

# ***Staphylococcus aureus***

## Disease Model

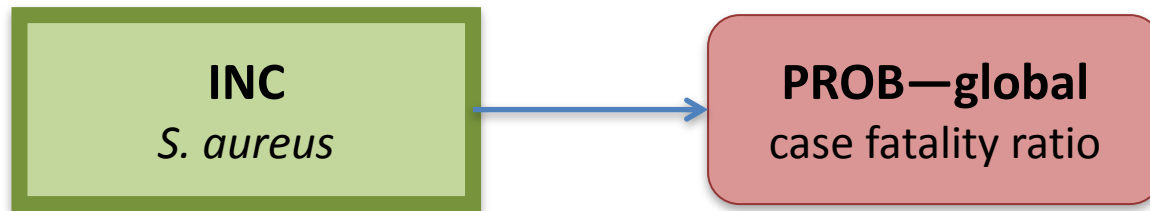

# *Echinococcus granulosus* Disease Model

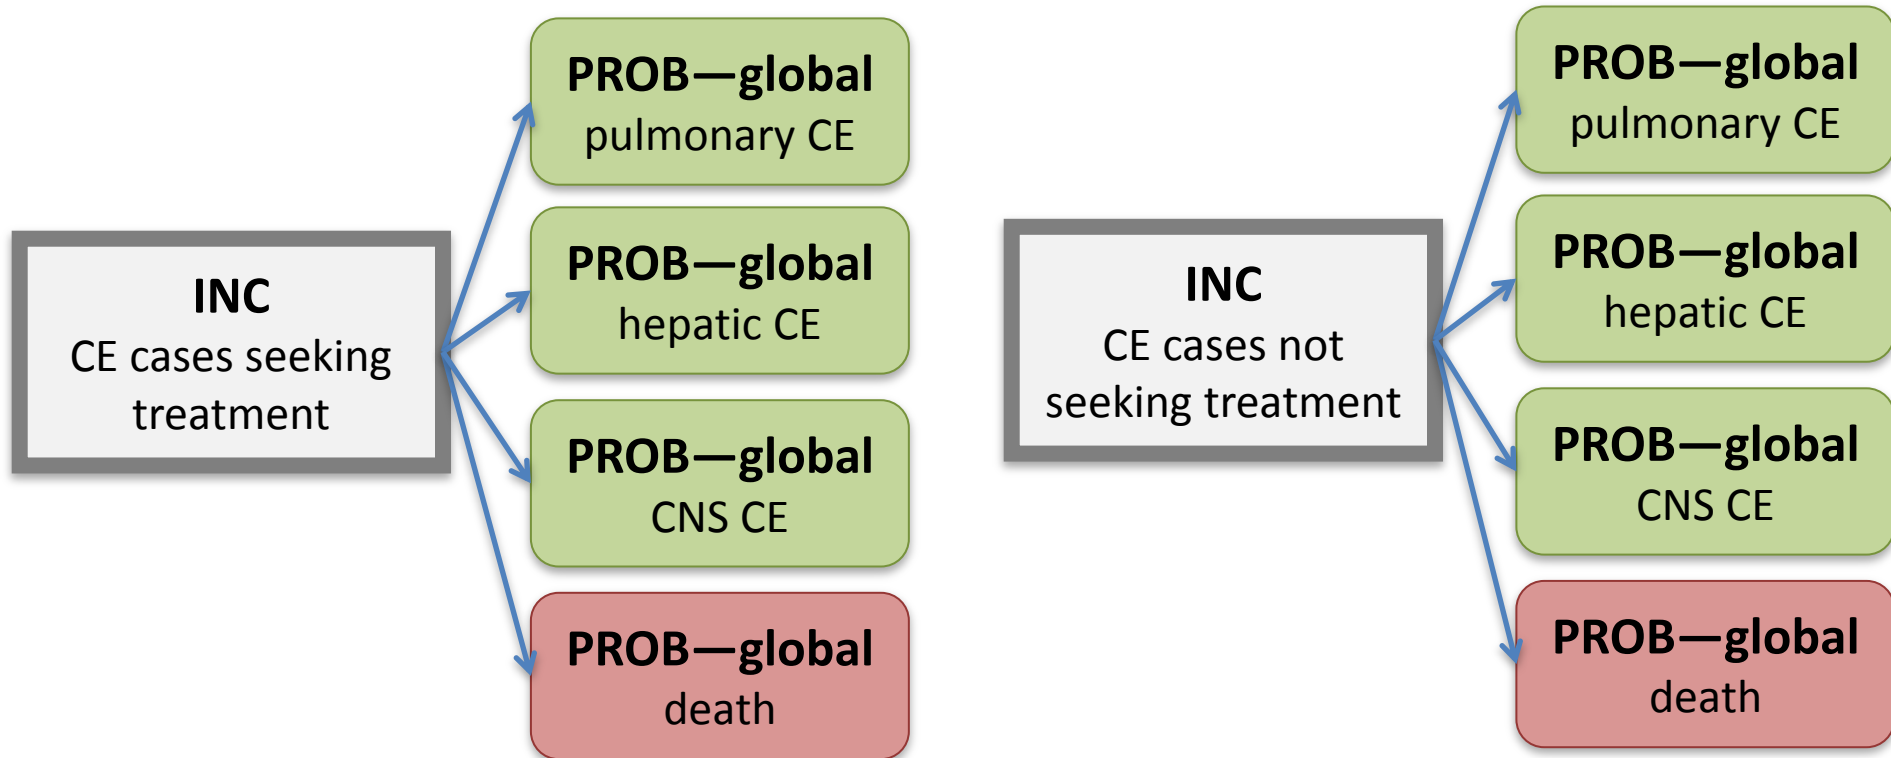



# ***Echinococcus multilocularis***

## Disease Model

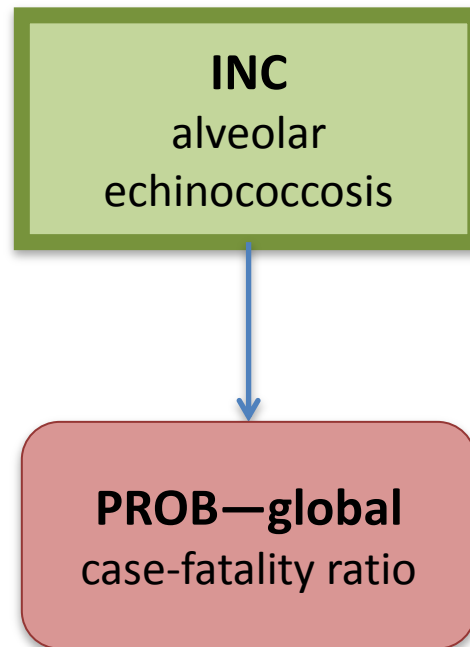

# *Taenia solium* Disease Model

**INCIDENCE**  
Epilepsy

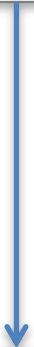

**PROB—global**  
NCC-associated  
epilepsy

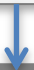

**PROB—local**  
*Taenia solium*  
population at risk

**MORTALITY**  
Epilepsy

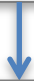

**RATIO—global**  
total:idiopathic  
epilepsy

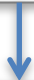

**PROB—global**  
NCC-associated  
epilepsy

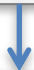

**PROB—local**  
*Taenia solium*  
population at risk

**YLD**  
Epilepsy

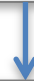

**RATIO—global**  
total:idiopathic  
epilepsy

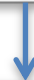

**PROB—global**  
NCC-associated  
epilepsy

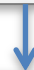

**PROB—local**  
*Taenia solium*  
population at risk

**YLL**  
Epilepsy

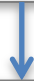

**RATIO—global**  
total:idiopathic  
epilepsy

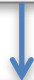

**PROB—global**  
NCC-associated  
epilepsy

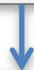

**PROB—local**  
*Taenia solium*  
population at risk

# *Trichinella* spp. Disease Model

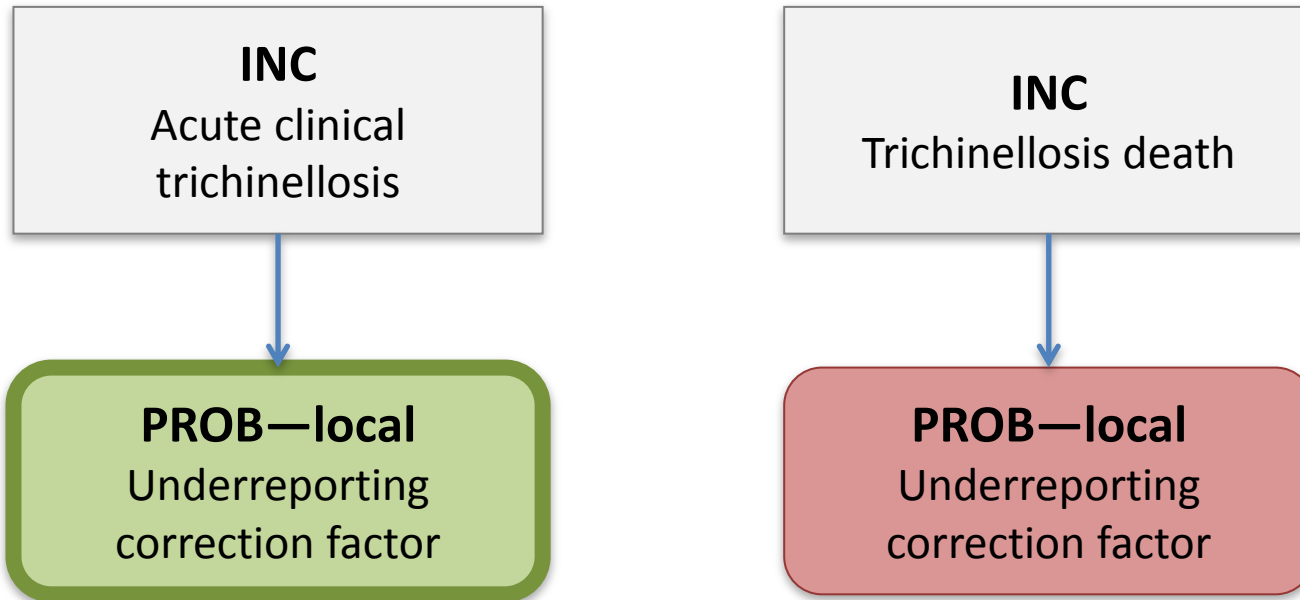

# *Ascaris* spp. Disease Model

**INC**  
ascariasis

**INC**  
ascariasis-related mild  
abdominopelvic  
problems

**INC**  
ascariasis-related  
severe wasting

**INC**  
ascariasis-related  
mortality

# *Clonorchis sinensis*

## Disease Model

**INC**

symptomatic  
clonorchiosis

**INC**

clonorchiosis-related  
mortality

# ***Fasciola* spp.**

## Disease Model

**INC**

symptomatic  
fasciolosis

# Intestinal flukes

## Disease Model

**INC**

symptomatic intestinal  
trematodosis

# *Opisthorchis* spp.

## Disease Model

**INC**  
symptomatic  
opisthorchiosis

**INC**  
opisthorchiosis-related  
mortality



# ***Paragonimus spp.***

## Disease Model

**INC**  
symptomatic  
paragonimosis

**INC**  
cerebral  
paragonimosis

**INC**  
paragonimosis-related  
mortality

# Dioxin Disease Model

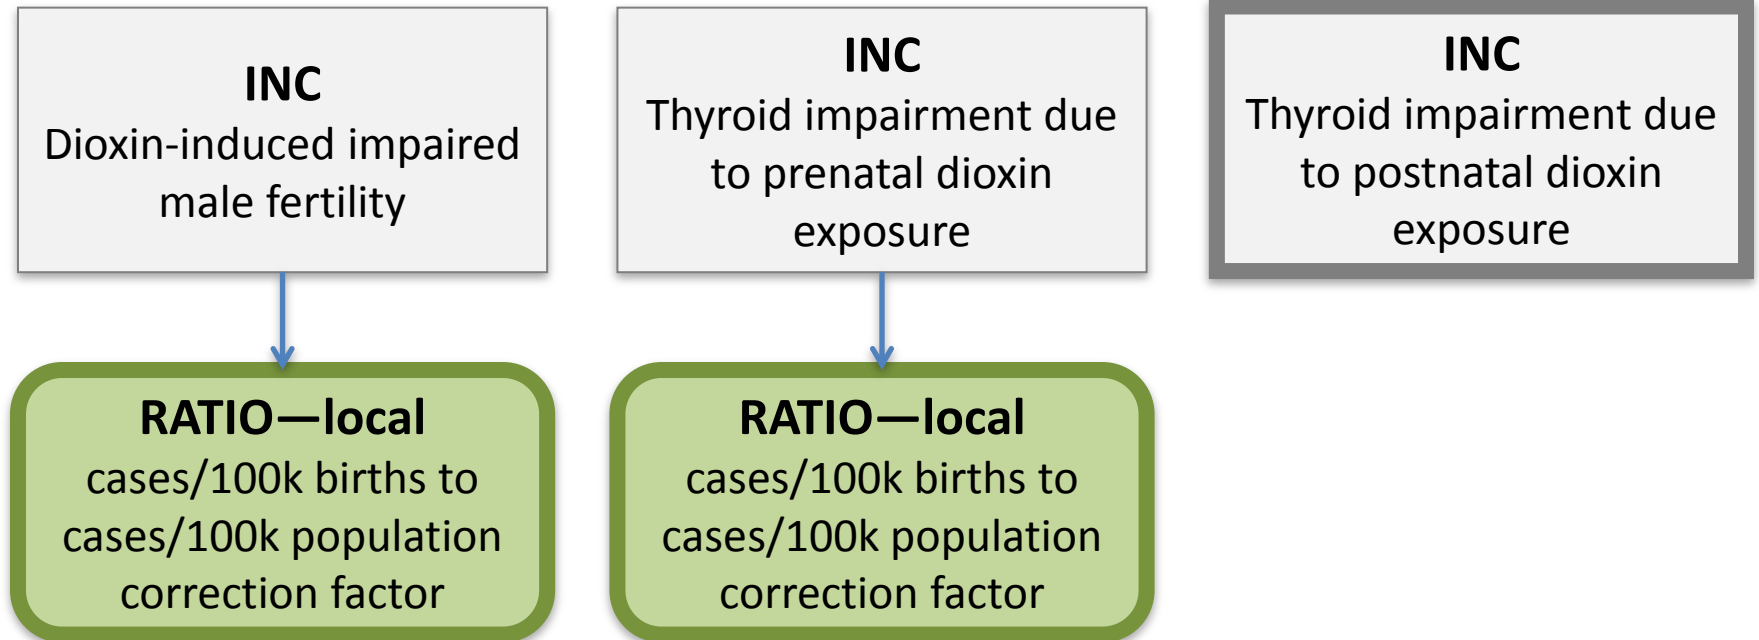

# Aflatoxin Disease Model

**INC**  
HCC

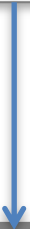

**PROB—local**  
PAF aflatoxin

**MRT**  
HCC

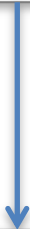

**PROB—local**  
PAF aflatoxin

**YLD**  
HCC

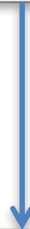

**PROB—local**  
PAF aflatoxin

**YLL**  
HCC

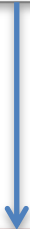

**PROB—local**  
PAF aflatoxin

# Cyanide in cassava Disease Model

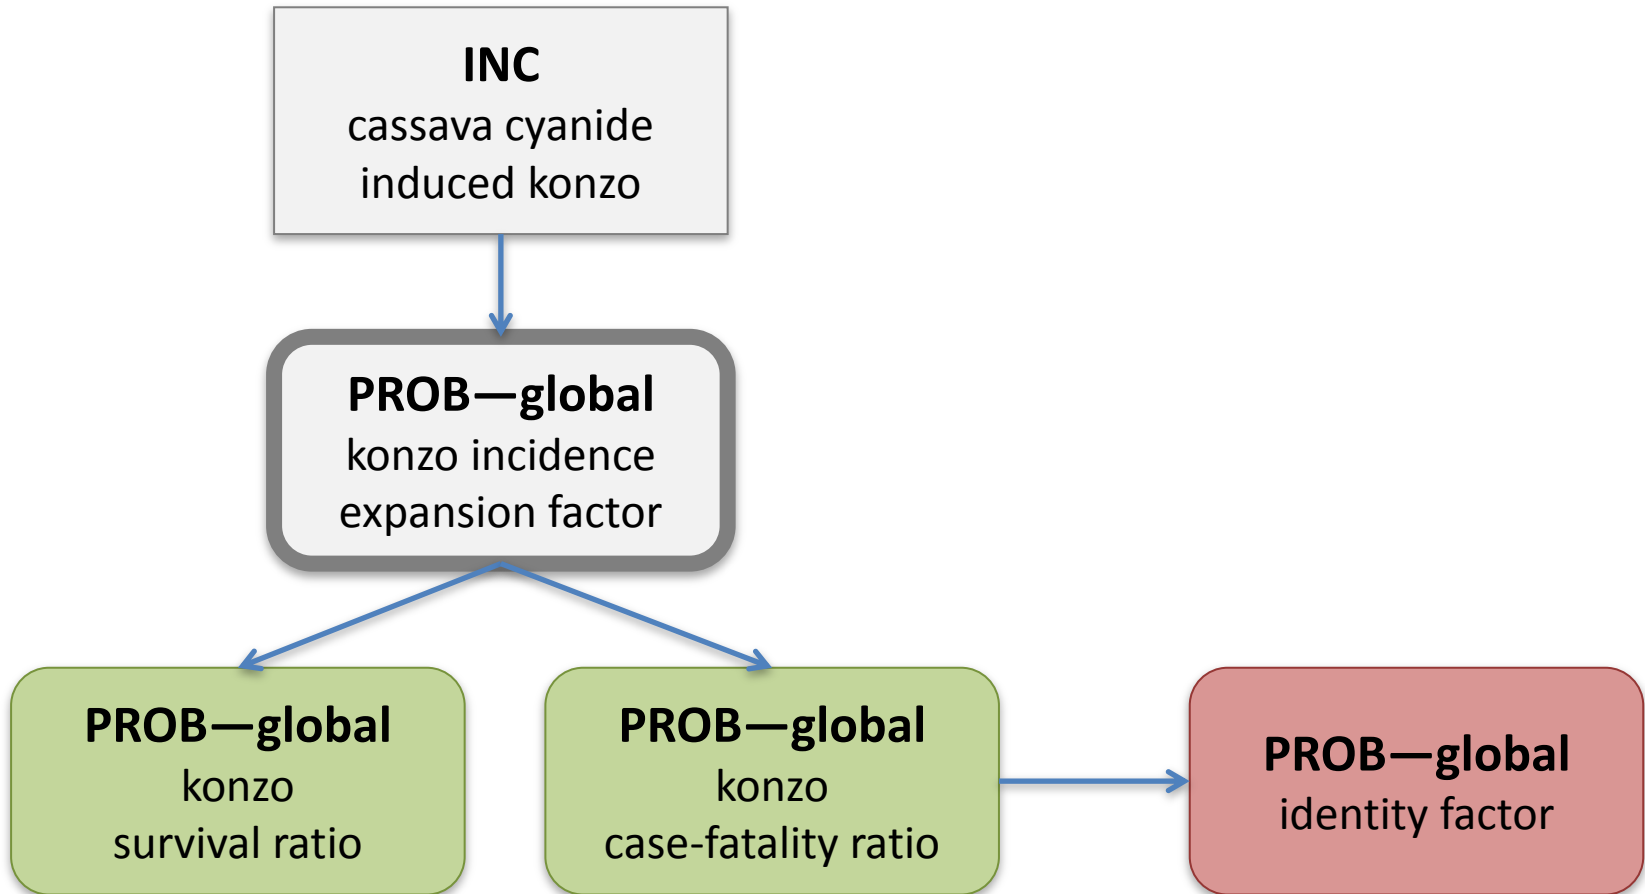

# Peanut allergen Disease Model

**INC**

Peanut-induced allergy

**INC**

Death due to peanut-  
induced allergy
